# Supplementary material for: Catalytic hydrolysis of carbonyl sulfide in blast furnace gas over Sm-Ce-Ox@ZrO2 catalyst
Source: Royal Society of Chemistry journal article supplement (doi:10.1039/d3ra06833a), 2024-01-01
Supplement: d3ra06833a1.pdf [file d3ra06833a1.pdf]

1 **Catalytic hydrolysis of carbonyl sulfide in blast furnace gas**  
2 **over Sm-Ce-O<sub>x</sub>@ZrO<sub>2</sub> catalyst**

3 Jintao Yu<sup>a†</sup>, Yao Lu<sup>a,c†</sup>, Sheng Wang<sup>b</sup>, Mutao Xu<sup>c,e</sup>, Qijie Jin<sup>c,e</sup>, Chengzhang Zhu<sup>c</sup>,  
4 Jisai Chen<sup>d\*</sup>, Haitao Xu<sup>c,e\*</sup>

5 *a. Shanghai Institute of Chemical Industry Environmental Engineering Co. Ltd,*  
6 *Shanghai 200333, PR China*

7 *b. State Key Laboratory for Clean and Efficient Coal-fired Power Generation and*  
8 *Pollution Control, State Key Laboratory of Low-carbon Smart Coal-fired Power*  
9 *Generation and Ultra-clean Emission, Nanjing 210046, China*

10 *c. School of Environmental Science and Engineering, Nanjing Tech University, Nanjing*  
11 *210009, PR China*

12 *d. CCSC Nanjing Luzhou Environment Protection Co., Nanjing 211100, PR China*

13 *e. Nanjing Gekof Institute of Environmental Protection Technology & Equipment Co.*  
14 *Ltd, Nanjing 210031, PR China*

15

16

17

18 †These authors contributed equally to this work.

19 \*Corresponding author: Prof. Jisai Chen; Prof. Haitao Xu

20 **E-mails:** chenjisai@sina.com (Jisai Chen); htxu@njtech.edu.cn (Haitao Xu)

## 21 Reagents

22 All chemicals were purchased from commercial sources and used without further  
23 treatment.  $\text{Ce}(\text{NO}_3)_2 \cdot 6\text{H}_2\text{O}$ , 99.5%, Shanghai Macklin Biochemical Co., Ltd;  
24  $\text{Sm}(\text{NO}_3)_3 \cdot 6\text{H}_2\text{O}$ , 99.9%, Shanghai Macklin Biochemical Co., Ltd;  $\text{Y}(\text{NO}_3)_3 \cdot 6\text{H}_2\text{O}$ ,  
25 99.9%, Shanghai Macklin Biochemical Co., Ltd;  $\text{Na}_2\text{CO}_3$ , 99%, Shanghai Macklin  
26 Biochemical Co., Ltd;  $\text{K}_2\text{CO}_3$ , 99%, Shanghai Macklin Biochemical Co., Ltd;  $\text{ZrO}_2$ ,  
27 99.99%, Sinopharm Chemical Reagent Co., Ltd.

## 28 Catalytic activity and selectivity measurement

29 The catalyst (1 mL) was added to a fixed-bed quartz reactor (inner diameter 8 mm)  
30 to study the catalytic activity of COS hydrolysis. First, the mixture gas (COS: 200 ppm,  
31  $\text{H}_2\text{O}$ : 2%,  $\text{N}_2$  as carrier gas) was introduced into the reactor, and water was injected into  
32 the gas mixing tank through a micro-injection pump, conversion of liquid water into  
33 water vapor into the reactor by heating in an oil bath. The total flow rate of flue gas was  
34 200 mL/min. The temperature range of the activity test was 60~180 °C, and the  
35 temperature was programmed. The experimental setup involves gradually increasing  
36 the temperature at a rate of 1 °C per minute, commencing from an initial temperature  
37 of 60 °C. Each subsequent temperature point for evaluating the catalytic performance  
38 is spaced apart by 30 °C. The exhaust gas was analyzed after heating to the target  
39 temperature and stabilizing for 30 min. Gas chromatography (Flame Photometric  
40 Detector (FPD) from Agilent for sulfide detection) was used to detect the concentration  
41 of COS and product  $\text{H}_2\text{S}$  at the inlet and outlet of the reactor.

42 COS conversion and  $\text{H}_2\text{S}$  selectivity are defined as follows:

$$43 \quad \text{COS Conversion}(\%) = \frac{\text{COS}_{in} - \text{COS}_{out}}{\text{COS}_{in}} \times 100\% \quad \text{Eq. (1)}$$

$$44 \quad \text{H}_2\text{S Selectivity}(\%) = \frac{\text{H}_2\text{S}_{out}}{\text{COS}_{in} - \text{COS}_{out}} \times 100\% \quad \text{Eq. (2)}$$

45 Among them,  $\text{COS}_{in}$  represented the COS concentration at inlet of the reactor,  
46  $\text{COS}_{out}$  represented the COS concentration at outlet of the reactor, and  $\text{H}_2\text{S}_{out}$

47 represented the H<sub>2</sub>S concentration at the outlet of the reactor.

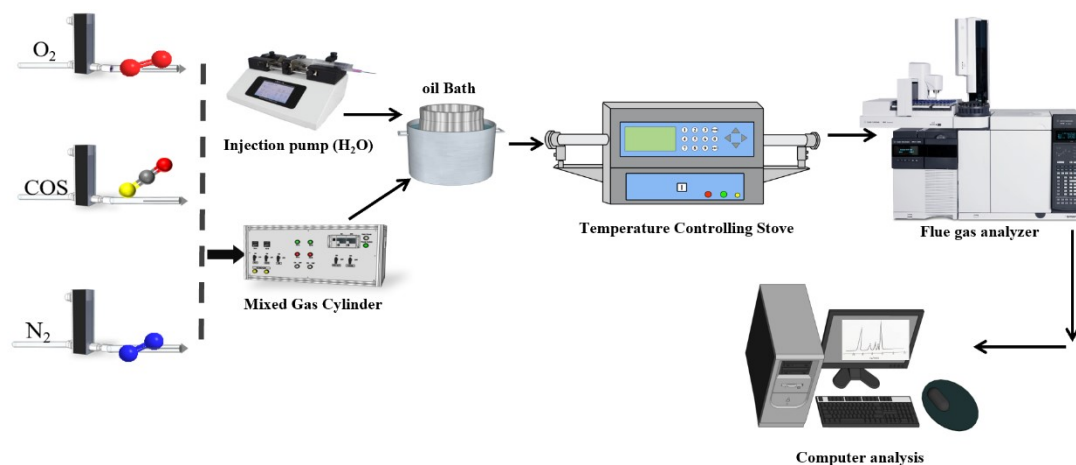

48

49 Fig.S1 Simulation diagram of experimental device.

## 50 Characterization

51 The structure of the catalyst was analysed using a Rigaku D max/RB X-ray  
52 diffractometer from Rigaku, Japan. The  $2\theta$  scanning range was from 5 to 85 °, starting  
53 at 5° and scanning to 85° at a scanning speed of 10 °/min.

54 The amount of N<sub>2</sub> adsorbed on the surface of the solid material was determined at  
55 different relative pressures at a constant temperature, and the data on the surface  
56 structural properties of the solids were calculated on the basis of the multilayer  
57 adsorption theoretical equations of Brunner-Emmet-Teller (BET) as well as the HK,  
58 BJH, and DFT equations. The BET data of the catalysts were obtained using an  
59 American ASAP 2020M V3.00H specific surface area analyzer. The catalysts were  
60 pretreated at 100 °C for 5 h under vacuum, and then the adsorption and desorption tests  
61 were carried out with N<sub>2</sub> as the adsorbent, and the adsorption temperature was  
62 maintained at -196 °C by using liquid nitrogen.

63 The surface acidity and surface oxygen species of the catalyst were tested and  
64 analyzed by a CHEMBET-3000 automatic chemical adsorption instrument. The  
65 catalysts were preheated in He atmosphere at 400 °C for 1 h and then cooled to 50 °C.  
66 After the catalyst was saturated with NH<sub>3</sub> at 50 °C, the catalyst was heated up to 800  
67 °C in a N<sub>2</sub> stream at a constant rate of 10 °C/min, the change in NH<sub>3</sub> desorption with

68 temperature was recorded continuously.

69 The redox performance of the catalysts was tested and analyzed by a  
70 Micromeritics TPD/TPR 2900 instrument. All catalysts were preheated at 400 °C for 1  
71 h and then cooled to 50 °C under Ar flow, and increased the temperature from 50 °C to  
72 800 °C at a heating rate of 10 °C/min.

73 The temperature programmed desorption of carbon dioxide (CO<sub>2</sub>-TPD) was  
74 conducted on the CHEMBET-3000 (Quantachrome) to obtain the surface alkaline  
75 properties. All the catalysts were preheated at 400 °C under a helium stream for 1 h,  
76 and then cooled to 50 °C for the carbon dioxide adsorption. Afterwards, the CO<sub>2</sub>  
77 adsorption was determined by a TCD detector from 50 °C to 800 °C in a 10% CO<sub>2</sub>/He  
78 atmosphere at a temperature increase rate of 10 °C/min.

79 Via AXIS ULTRA DLD instrument (Al-K $\alpha$  radiation, 1486.6 eV) to obtain X-ray  
80 photoelectron spectroscopy (XPS) maps. The vacuum was maintained at 10<sup>-7</sup> Pa. The  
81 samples were dried at 100 °C for 24 h to remove H<sub>2</sub>O. The obtained curves were fitted  
82 using XPSPEAK 4.1 software with Shirley background.
